# Supplementary material
Source: ML conference proceedings conference paper supplement (https://openaccess.thecvf.com/content/WACV2026/html/Vemuri_F-INR_Functional_Tensor_WACV_2026_paper.html)
Supplement: Supplementary file 2 [file 0829_buttefly.pdf › 1371_F_INR_Functional_Tensor_D_Supplementary Material/imgs/0829_buttefly.pdf]

Input Image

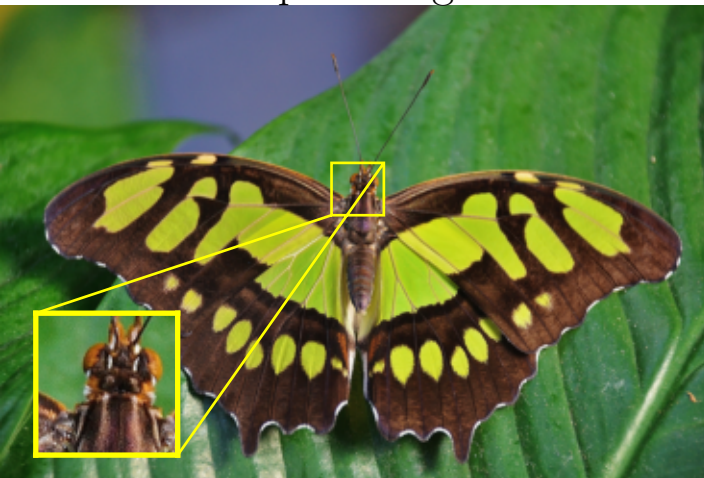

[tiny-cuda-nn]

SIREN HE

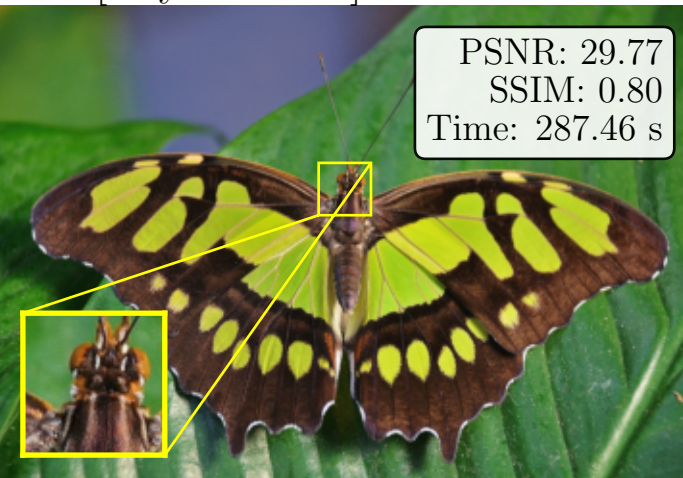

WIRE PE100

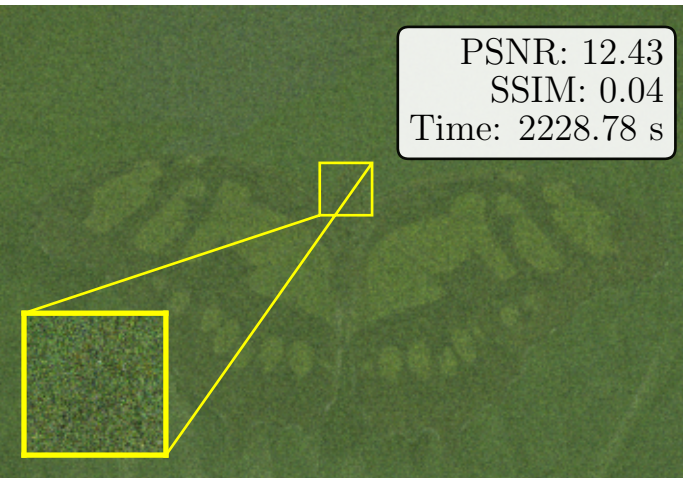

[tiny-cuda-nn]

ReLU PE100

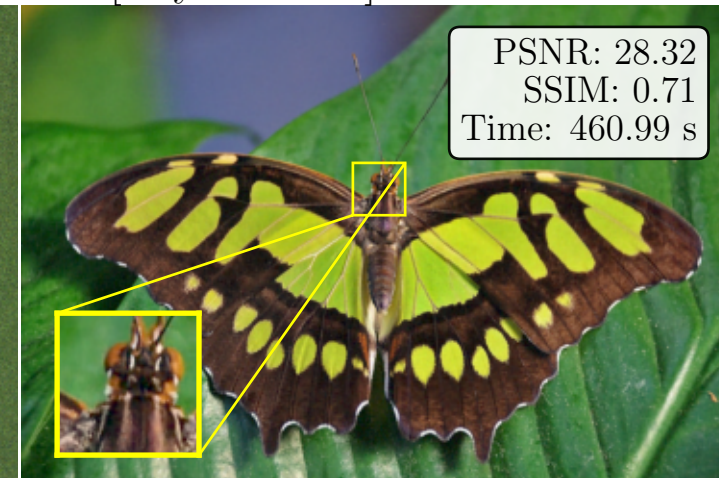

FINER PE100

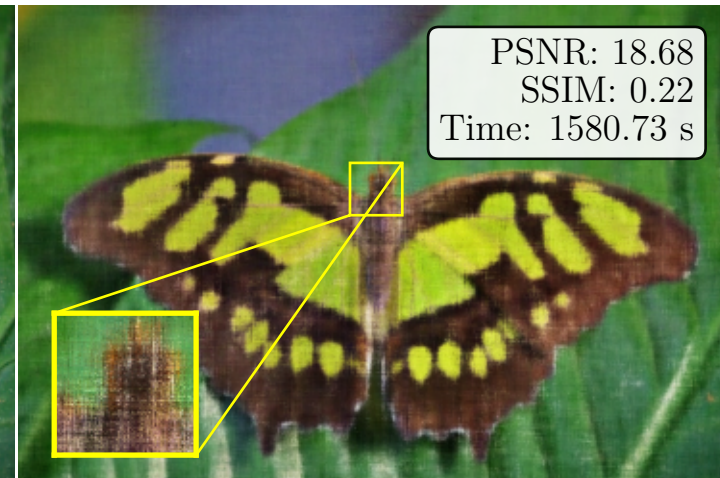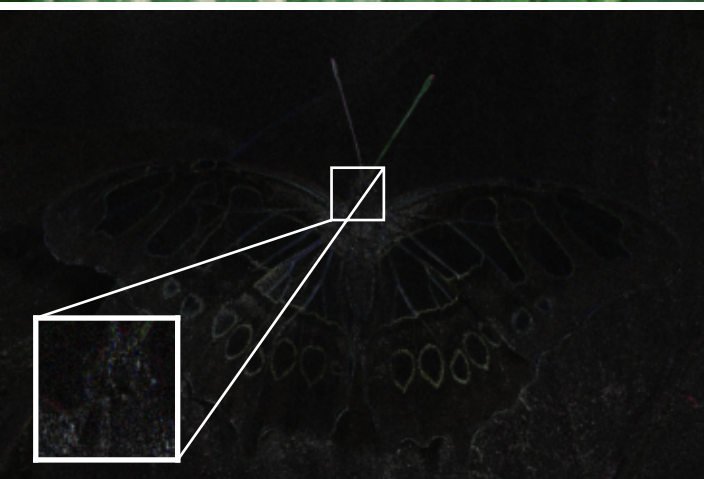

Best Pixel Difference\* [5dB boosted]

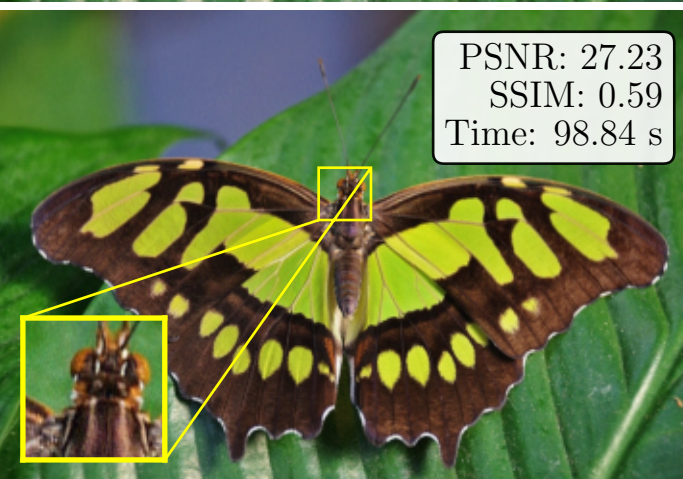

SIREN HE CP 256

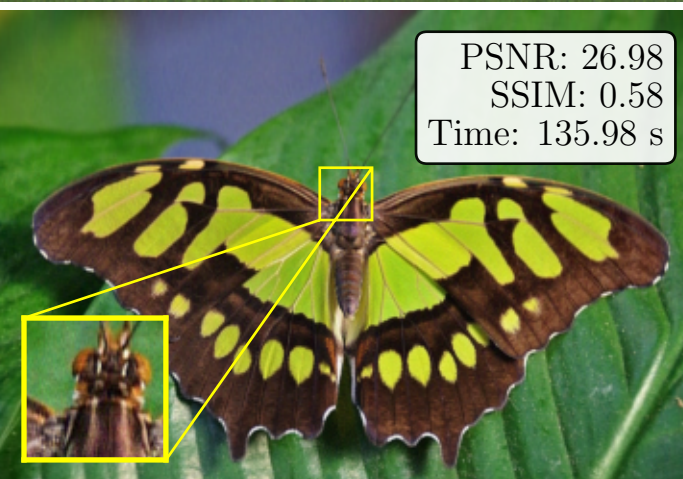

WIRE PE100 CP 316

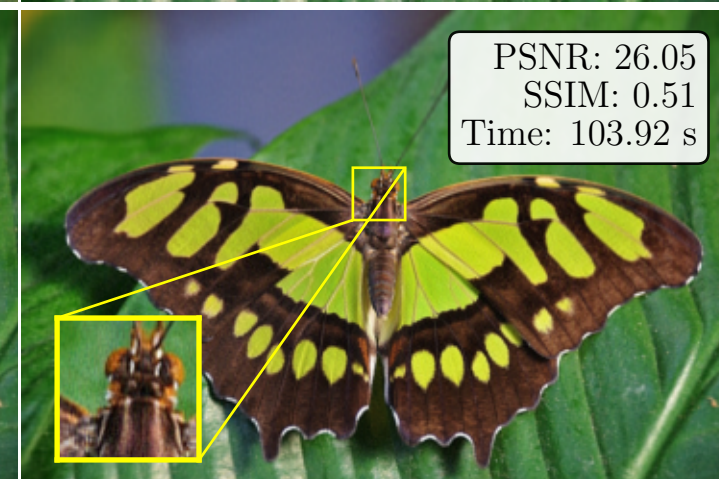

ReLU PE100 CP 316

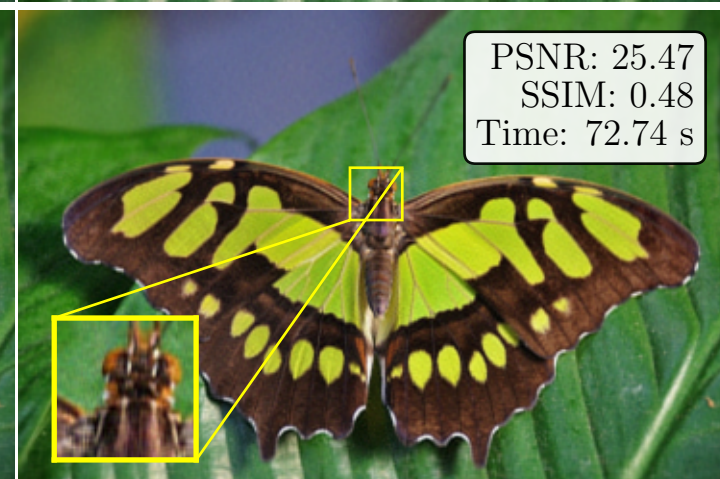

FINER PE100 CP 128
