# Supplementary material
Source: ML conference proceedings conference paper supplement (https://openaccess.thecvf.com/content/WACV2026/html/Vemuri_F-INR_Functional_Tensor_WACV_2026_paper.html)
Supplement: Supplementary file 3 [file 0886_parrot.pdf › 1371_F_INR_Functional_Tensor_D_Supplementary Material/imgs/0886_parrot.pdf]

Input Image

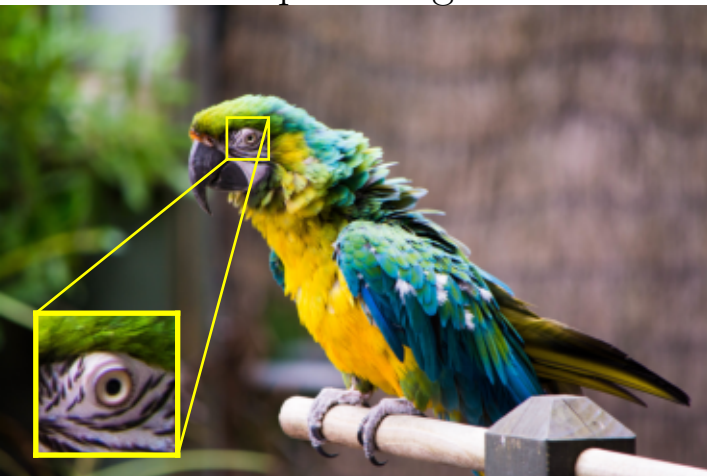

[tiny-cuda-nn] SIREN PE010

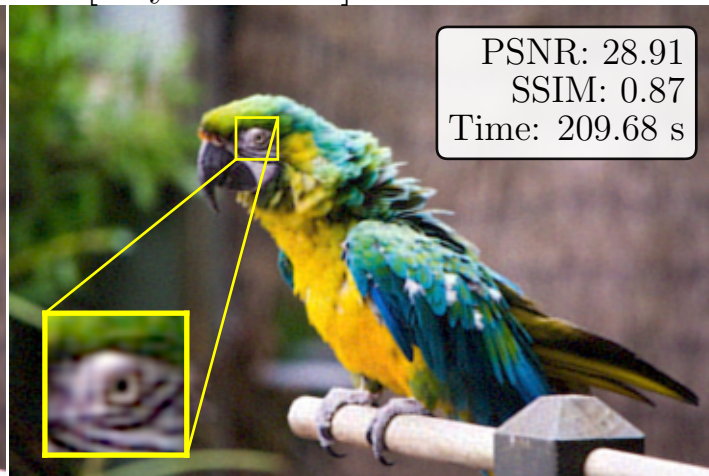

WIRE PE010

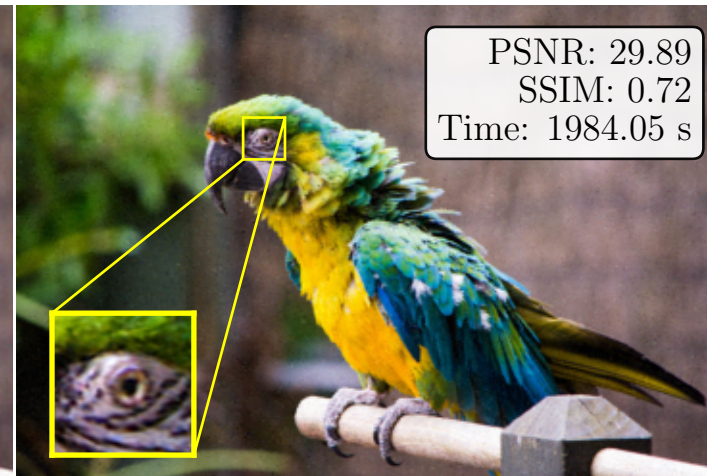

[tiny-cuda-nn] ReLU PE100

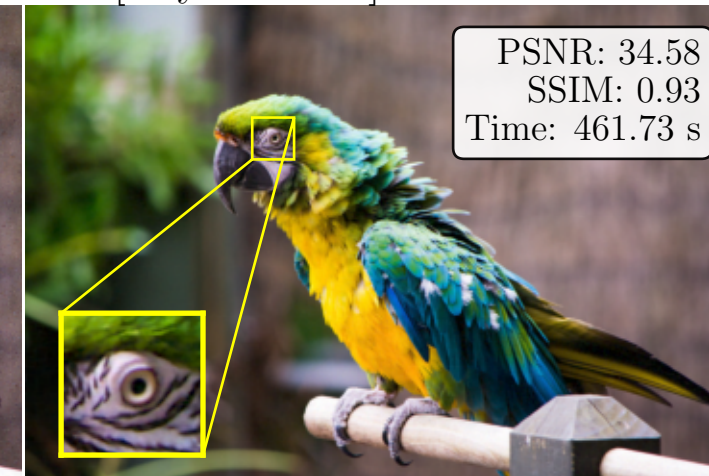

FINER PE100

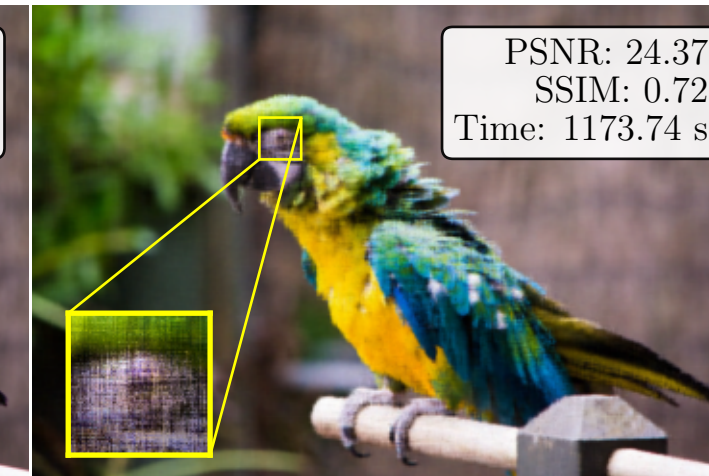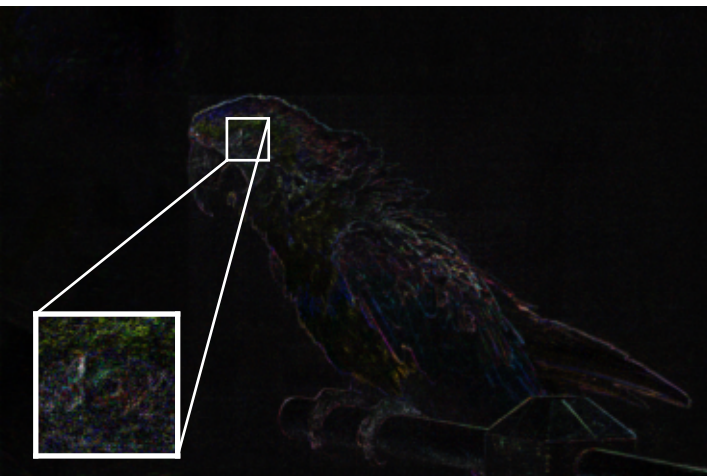

Best Pixel Difference\* [5dB boosted]

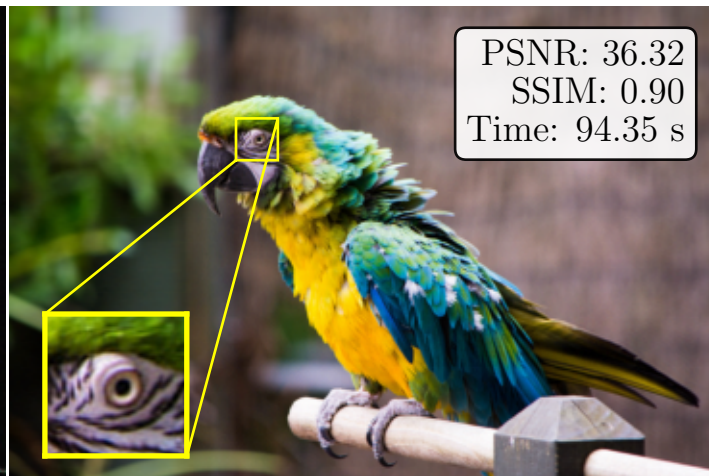

SIREN PE010 CP 256

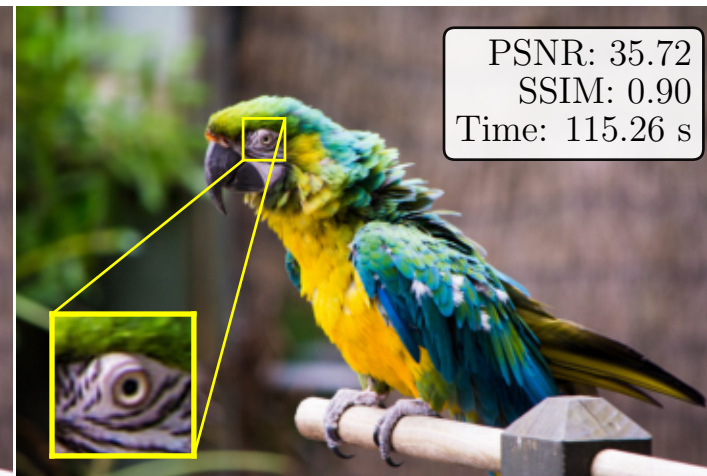

WIRE PE010 CP 316

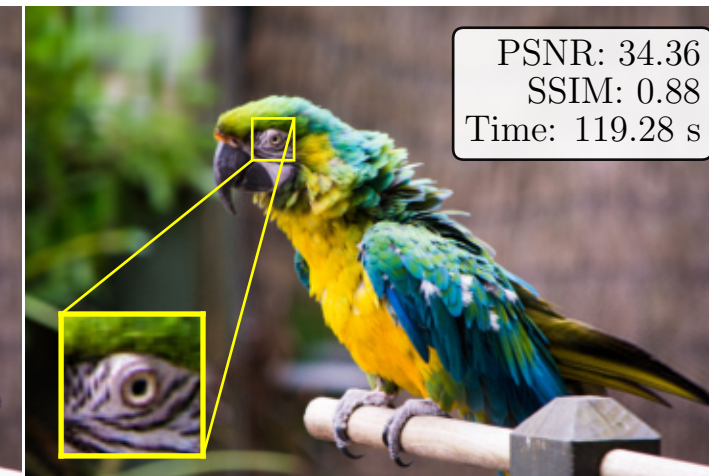

ReLU PE100 CP 316

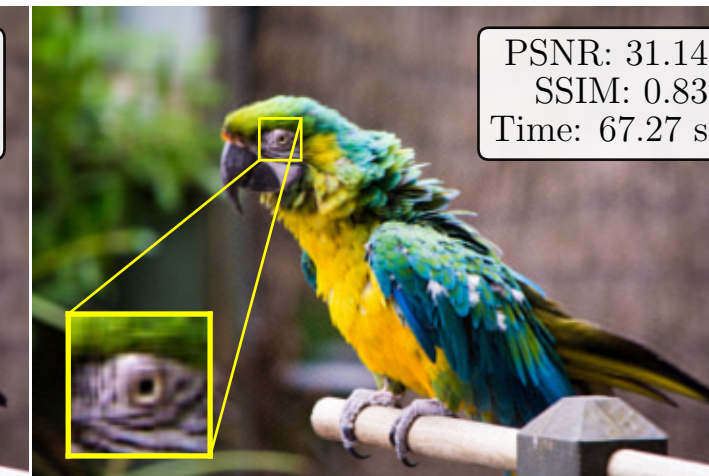

FINER PE100 CP 128
