# Supplementary material
Source: ML conference proceedings conference paper supplement (https://openaccess.thecvf.com/content/WACV2026/html/Vemuri_F-INR_Functional_Tensor_WACV_2026_paper.html)
Supplement: Supplementary file 5 [file Armadillo_256_voxel.pdf › 1371_F_INR_Functional_Tensor_D_Supplementary Material/sdfs/Armadillo_256_voxel.pdf]

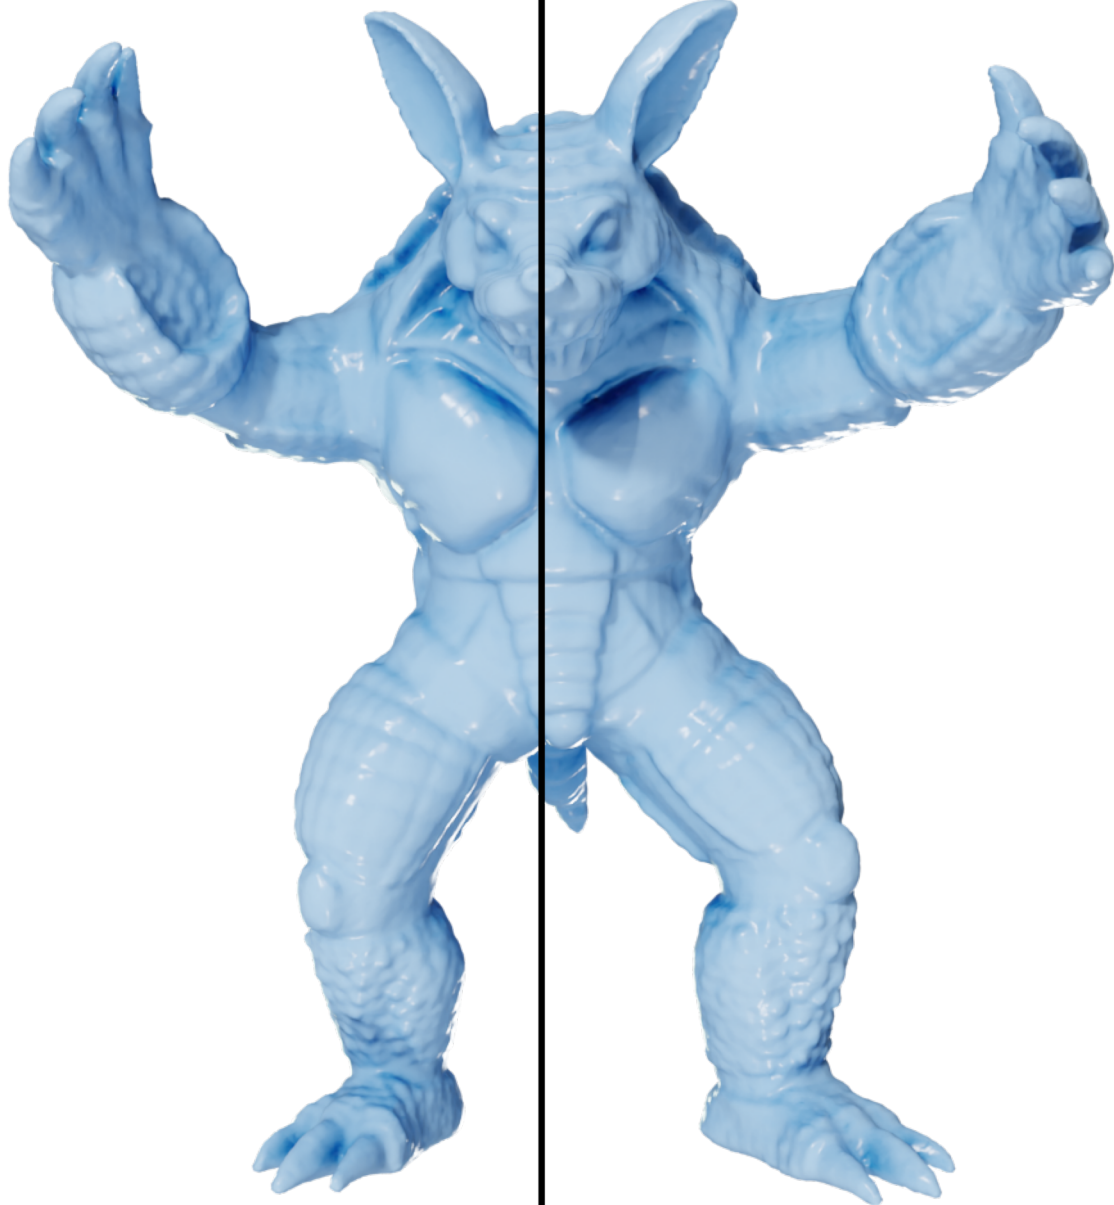

Ground Truth

WIRE PE010 TT 128

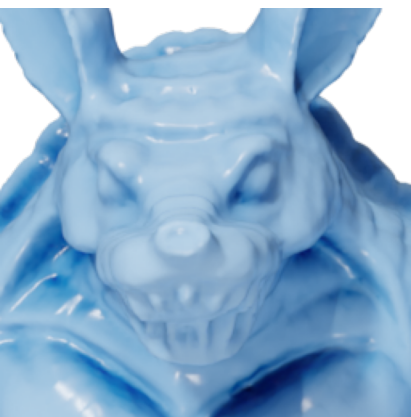

Ground Truth

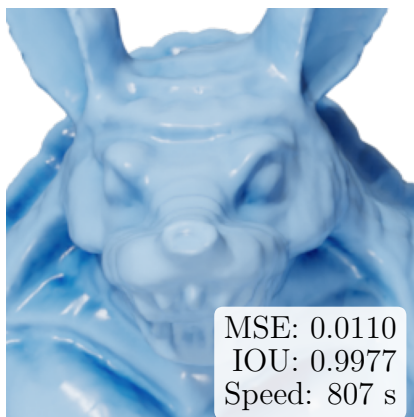

WIRE PE010 TT 128

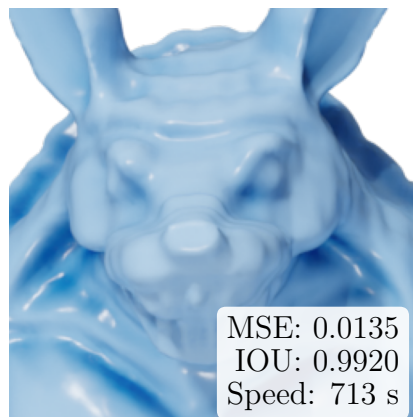

ReLU PE010 TU 128

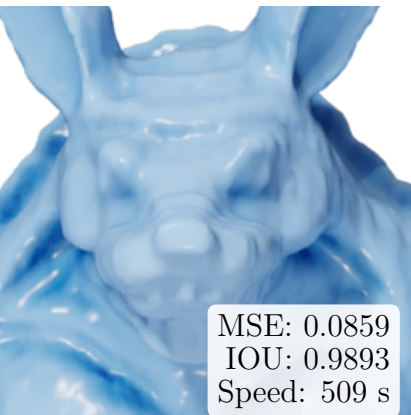

SIREN TU 064

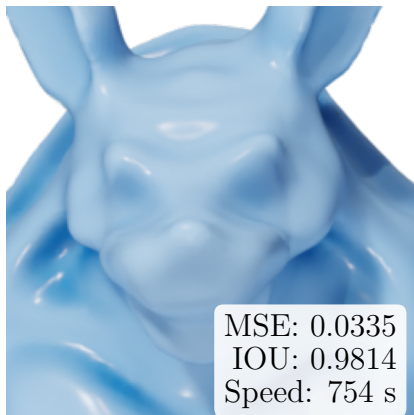

TANH PE010 TT 128

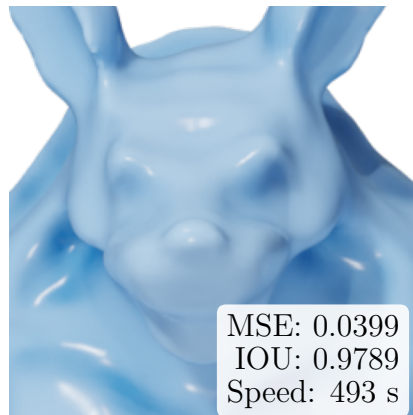

FINER PE010 TT 064

MSE: 0.0110  
IOU: 0.9977  
Speed: 807 s

MSE: 0.0135  
IOU: 0.9920  
Speed: 713 s

MSE: 0.0859  
IOU: 0.9893  
Speed: 509 s

MSE: 0.0335  
IOU: 0.9814  
Speed: 754 s

MSE: 0.0399  
IOU: 0.9789  
Speed: 493 s
