# Supplementary material
Source: ML conference proceedings conference paper supplement (https://openaccess.thecvf.com/content/WACV2026/html/Vemuri_F-INR_Functional_Tensor_WACV_2026_paper.html)
Supplement: Supplementary file 6 [file Dragon_256_voxel.pdf › 1371_F_INR_Functional_Tensor_D_Supplementary Material/sdfs/Dragon_256_voxel.pdf]

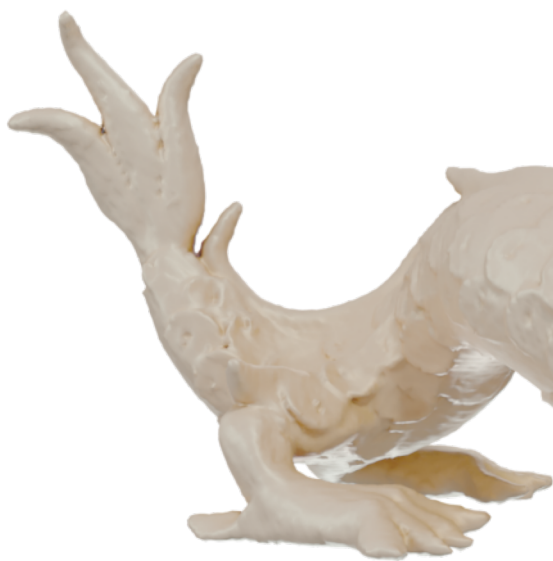

Ground Truth

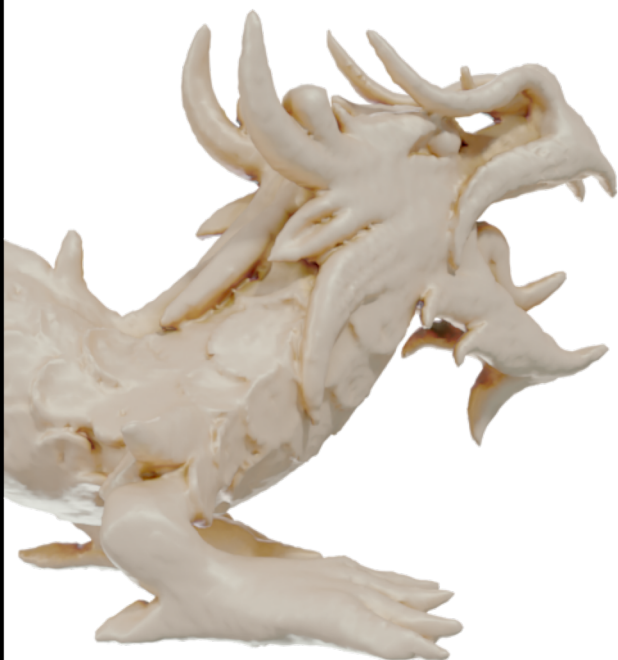

WIRE PE010 TT 064

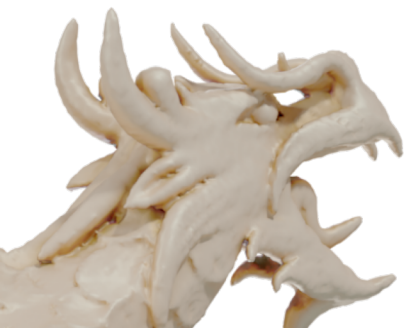

Ground Truth

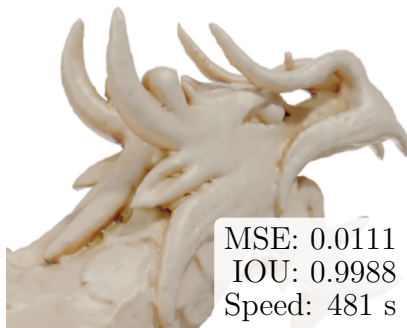

WIRE PE010 TT 064

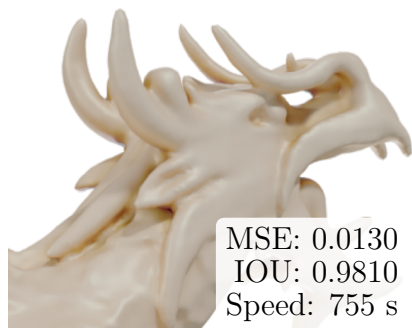

ReLU PE010 TU 128

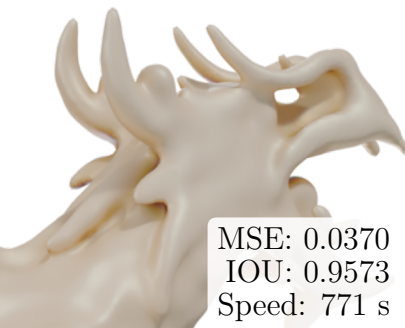

TANH PE010 TU 128

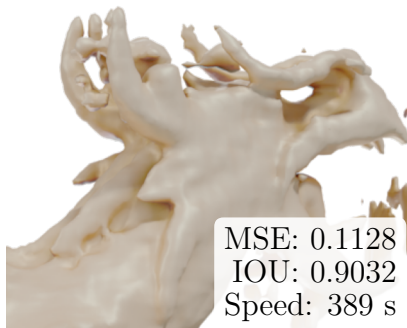

SIREN CP 032

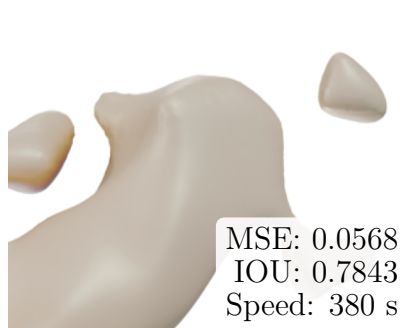

FINER CP 032

MSE: 0.0111  
IOU: 0.9988  
Speed: 481 s

MSE: 0.0130  
IOU: 0.9810  
Speed: 755 s

MSE: 0.0370  
IOU: 0.9573  
Speed: 771 s

MSE: 0.1128  
IOU: 0.9032  
Speed: 389 s

MSE: 0.0568  
IOU: 0.7843  
Speed: 380 s
