# Supplementary material
Source: ML conference proceedings conference paper supplement (https://openaccess.thecvf.com/content/WACV2026/html/Vemuri_F-INR_Functional_Tensor_WACV_2026_paper.html)
Supplement: Supplementary file 7 [file Lucy_256_voxel.pdf › 1371_F_INR_Functional_Tensor_D_Supplementary Material/sdfs/Lucy_256_voxel.pdf]

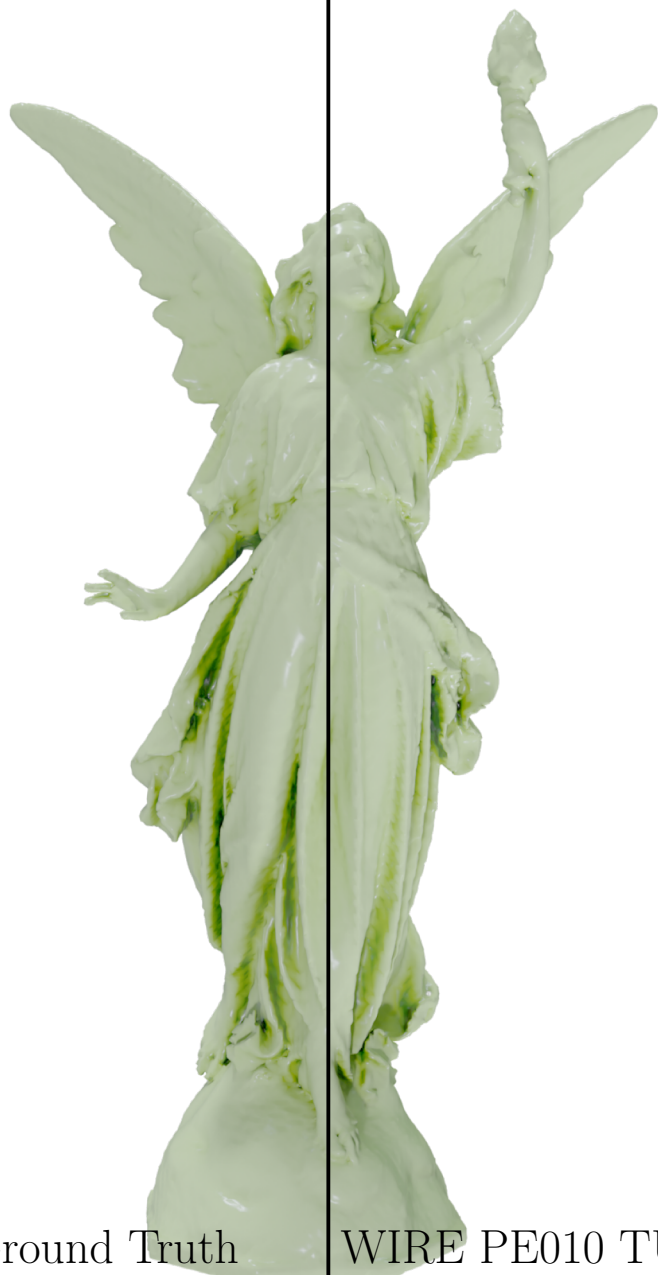

Ground Truth

WIRE PE010 TU 128

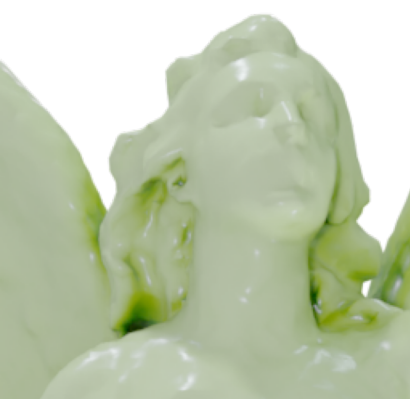

Ground Truth

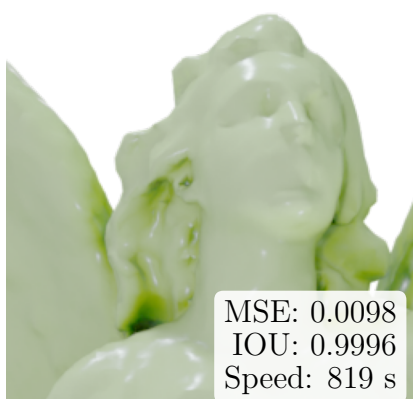

WIRE PE010 TU 128

MSE: 0.0098  
IOU: 0.9996  
Speed: 819 s

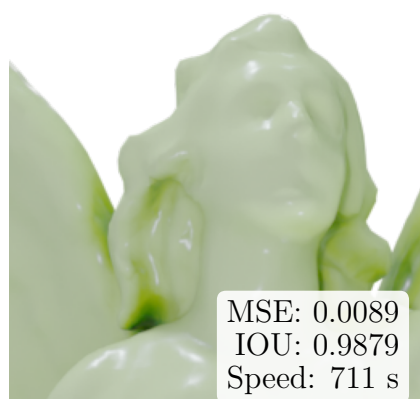

ReLU PE010 TU 128

MSE: 0.0089  
IOU: 0.9879  
Speed: 711 s

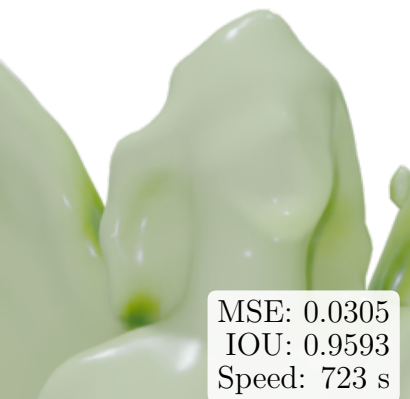

TANH PE010 TU 128

MSE: 0.0305  
IOU: 0.9593  
Speed: 723 s

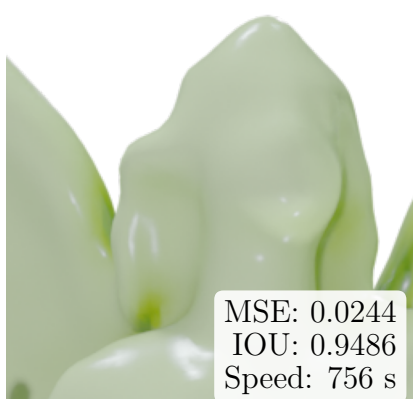

FINER PE010 TT 128

MSE: 0.0244  
IOU: 0.9486  
Speed: 756 s

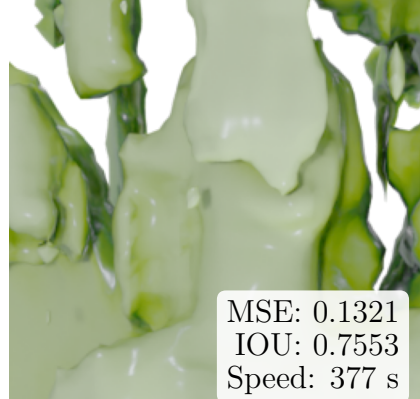

SIREN CP 032

MSE: 0.1321  
IOU: 0.7553  
Speed: 377 s
