# Supplementary material
Source: ML conference proceedings conference paper supplement (https://openaccess.thecvf.com/content/WACV2026/html/Vemuri_F-INR_Functional_Tensor_WACV_2026_paper.html)
Supplement: Supplementary file 8 [file Statuette_256_voxel.pdf › 1371_F_INR_Functional_Tensor_D_Supplementary Material/sdfs/Statuette_256_voxel.pdf]

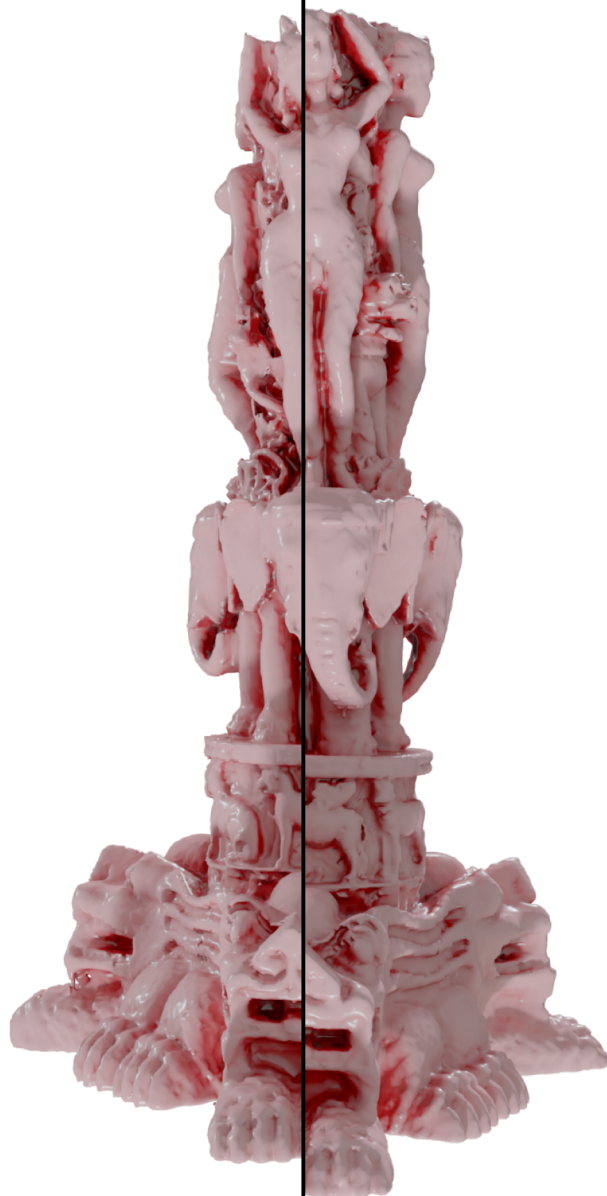

Ground Truth

WIRE PE010 TT 128

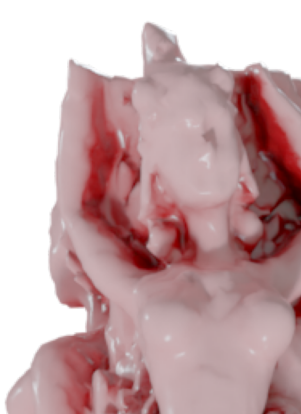

Ground Truth

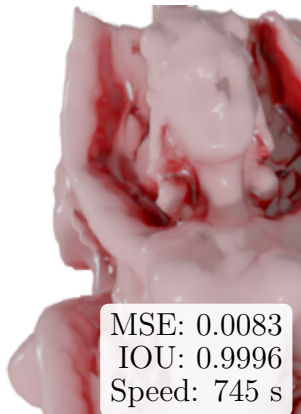

MSE: 0.0083  
IOU: 0.9996  
Speed: 745 s

WIRE PE010 TT 128

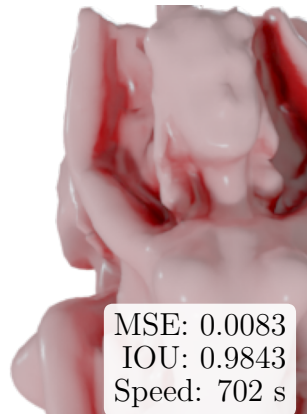

MSE: 0.0083  
IOU: 0.9843  
Speed: 702 s

ReLU PE010 TT 128

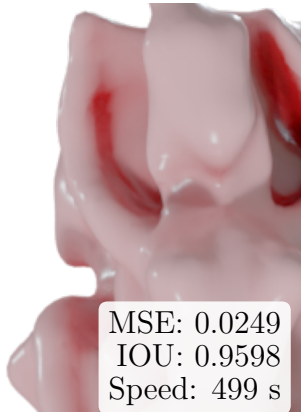

MSE: 0.0249  
IOU: 0.9598  
Speed: 499 s

TANH PE010 TU 064

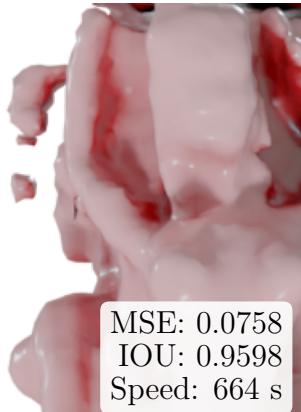

MSE: 0.0758  
IOU: 0.9598  
Speed: 664 s

SIREN CP 064

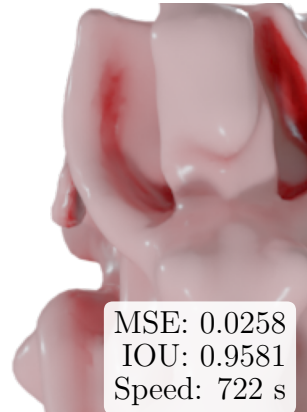

MSE: 0.0258  
IOU: 0.9581  
Speed: 722 s

FINER PE010 TT 128
