# Supplementary material
Source: ML conference proceedings conference paper supplement (https://openaccess.thecvf.com/content/WACV2026/html/Vemuri_F-INR_Functional_Tensor_WACV_2026_paper.html)

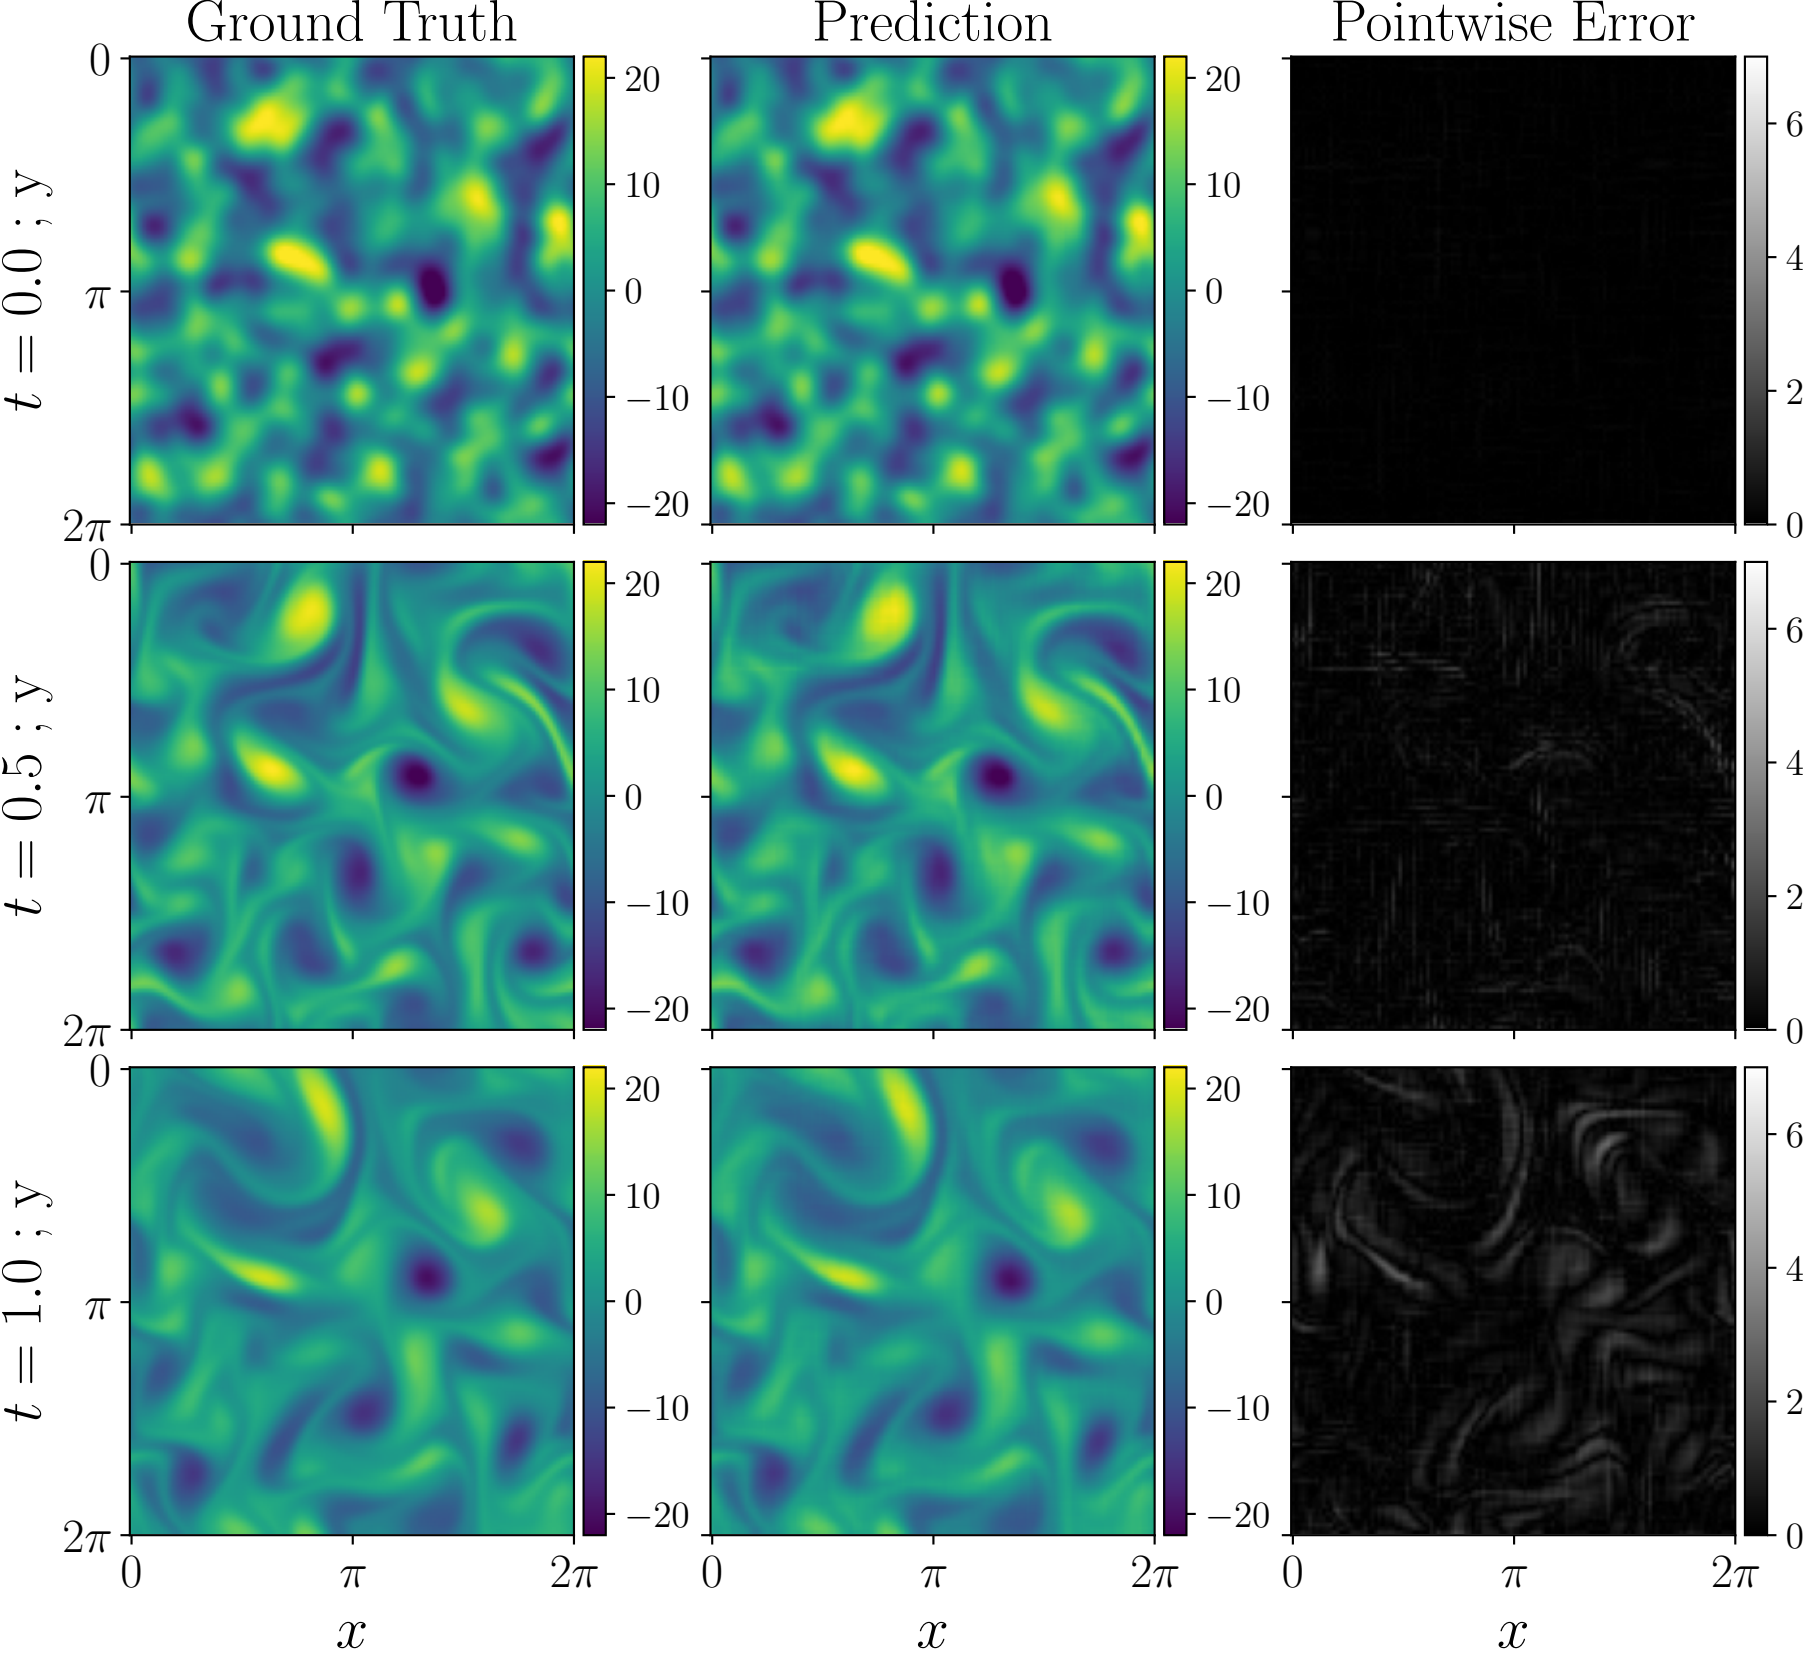

Supplement: Supplementary file 4 [file Navier-Stokes_F-INR_TT.pdf › 1371_F_INR_Functional_Tensor_D_Supplementary Material/pinn/Navier-Stokes_F-INR_TT.pdf]
